# Supplementary material for: Conformational selection underpins recognition of multiple DNA sequences by proteins and consequent functional actions
Source: Royal Society of Chemistry journal article supplement (doi:10.1039/c6cp03278h), 2016-01-01

## **Supplementary Information**

### **Conformational Selection Underpins Recognition of Multiple DNA sequences by Proteins and Consequent Functional Actions**

Gitashri Naiya, Paromita Raha, Manas Kumar Mondal, Uttam Pal, Rajesh Saha, Susobhan Chaudhuri, Subrata Batabyal, Samir Kumar Pal, Dhananjay Bhattacharyya, Nakul C. Maiti and Siddhartha Roy

**Table S1:** Comparison of Protein-DNA interfaces of O1/LacI and O2/LacI complexes

| KEI                 |                    |             | KEJ                 |                    |             |
|---------------------|--------------------|-------------|---------------------|--------------------|-------------|
| Protein Atom        | DNA Atom           | Distance    | Protein Atom        | DNA Atom           | Distance    |
| <b>K2:A (NZ)</b>    | <b>G13:D (OP2)</b> | <b>3.06</b> |                     |                    |             |
| <b>L6:A (N)</b>     | C14:D (OP2)        | 2.75        | L6:A (N)            | C14:D (OP2)        | 2.77        |
| <b>16S:A (N)</b>    | <b>G6:C (OP2)</b>  | <b>3.07</b> | <b>16S:A (N)</b>    | <b>G6:C (OP2)</b>  | <b>2.84</b> |
|                     |                    |             | <b>16S:A (OG)</b>   | <b>G6:C (OP2)</b>  | <b>2.82</b> |
| <b>17Y:A (OH)</b>   | <b>G8:C (O6)</b>   | <b>2.78</b> | <b>17Y:A (OH)</b>   | <b>G8:C (O6)</b>   | <b>3.06</b> |
| <b>Q18:A (OE1)</b>  | <b>C16:D (N4)</b>  | <b>3.13</b> | <b>Q18:A (OE1)</b>  | <b>C16:D (N4)</b>  | <b>3.35</b> |
| <b>T19A:A (OG1)</b> | <b>G6:C (OP2)</b>  | <b>2.93</b> | <b>T19A:A (OG1)</b> | <b>G6:C (OP2)</b>  | <b>2.59</b> |
| <b>R22:A (NH2)</b>  | <b>T5:C (OP2)</b>  | <b>2.66</b> |                     |                    |             |
| <b>N25:A (ND2)</b>  | <b>T15:D (OP2)</b> | <b>2.82</b> |                     |                    |             |
|                     |                    |             | <b>S21:A (OG)</b>   | <b>T15:D (OP2)</b> | <b>2.69</b> |
|                     |                    |             | <b>S31:A (OG)</b>   | <b>T5:C (OP2)</b>  | <b>2.88</b> |
| <b>T34:A (OG1)</b>  | <b>T5:C (OP1)</b>  | <b>2.77</b> | <b>T34:A (OG1)</b>  | <b>T5C (OP1)</b>   | <b>2.46</b> |
| <b>Y47:A (OH)</b>   | <b>C14:D (OP1)</b> | <b>3.01</b> | <b>Y47:A (OH)</b>   | <b>C14:D (OP1)</b> | <b>2.74</b> |
| <b>N50:A (N)</b>    | C14:D (OP1)        | 3.05        | N50:A (N)           | C14:D (OP1)        | 3.03        |
| <b>N50:A (ND2)</b>  | <b>C14:D (OP1)</b> | <b>3.11</b> |                     |                    |             |
|                     |                    |             | <b>A53:A (O)</b>    | <b>G13:D (N2)</b>  | <b>3.41</b> |
|                     |                    |             | <b>K59:A (NZ)</b>   | <b>T15:D (OP1)</b> | <b>3.03</b> |
|                     |                    |             | <b>M1:B (N)</b>     | <b>G12:C (OP1)</b> | <b>2.68</b> |
|                     |                    |             | <b>L6:B (N)</b>     | <b>A13:C (OP2)</b> | <b>2.85</b> |
| <b>S16:B (N)</b>    | G6:D (OP2)         | 2.94        | S16:B (N)           | G6:D (OP2)         | 2.81        |
| <b>S16:B (OG)</b>   | G6:D (OP2)         | 2.79        | S16:B (OG)          | G6:D (OP2)         | 2.79        |
| <b>T19:B (OG1)</b>  | G6:D (OP2)         | 2.61        | T19:B (OG1)         | G6:D (OP2)         | 2.58        |
|                     |                    |             | <b>S21:B (OG)</b>   | <b>G14:C (OP2)</b> | <b>2.74</b> |
| <b>R22:B (NH1)</b>  | <b>G6:D (O6)</b>   | <b>2.90</b> |                     |                    |             |
| <b>R22:B (NH2)</b>  | <b>G6:D (N7)</b>   | <b>2.90</b> |                     |                    |             |
| <b>N25:B (ND2)</b>  | T15:C (OP2)        | 2.84        | N25:B (ND2)         | T15:C (OP2)        | 2.81        |
|                     |                    |             | <b>V30:B (N)</b>    | <b>T4:D (OP2)</b>  | <b>3.15</b> |
| <b>S31:B (N)</b>    | T5:D (OP2)         | 2.91        | S31:B (N)           | T5:D (OP2)         | 2.76        |
| <b>S31:B (OG)</b>   | T5:D (OP1)         | 2.92        | S31:B (OG)          | T5:D (OP1)         | 2.80        |
| <b>T34:B (OG1)</b>  | <b>T5:D (OP1)</b>  | <b>2.52</b> |                     |                    |             |
|                     |                    |             | <b>Y47:B (OH)</b>   | <b>A13:C (OP1)</b> | <b>2.54</b> |
| <b>N50:B (N)</b>    | G13:C (OP1)        | 2.91        | N50:B (N)           | A13:C (OP1)        | 2.96        |
| <b>A53:B (O)</b>    | <b>G12:C (N2)</b>  | <b>2.96</b> | <b>A53:B (O)</b>    | <b>G12:C (N2)</b>  | <b>2.79</b> |
|                     |                    |             | <b>K59:B (NZ)</b>   | <b>T15:C (OP2)</b> | <b>2.79</b> |

Atom distances were obtained from WHATIF server.

**Table S2**

The Effect of Base Mutations in the Left half

| Seq<br>O <sub>E</sub> | Seq<br>sub. | K <sub>d</sub><br>(nM) | $\Delta\Delta G^\circ$<br>Kcal.<br>Mole <sup>-1</sup> | SE   | Seq<br>O <sub>I</sub> | Seq<br>sub. | K <sub>d</sub><br>(nM) | $\Delta\Delta G^\circ$<br>Kcal.<br>Mole <sup>-1</sup> | SE   | P   |
|-----------------------|-------------|------------------------|-------------------------------------------------------|------|-----------------------|-------------|------------------------|-------------------------------------------------------|------|-----|
| G1                    | T           | 31±14                  | 1.71                                                  | 0.38 | A1                    | T           | 820±77                 | 3.18                                                  | 0.21 | *** |
|                       | A           | 304±182                | 3.08                                                  | 0.48 |                       | G           | 1000±77                | 3.30                                                  | 0.21 |     |
|                       | C           | 48±21                  | 1.99                                                  | 0.38 |                       | C           | 906±90                 | 3.24                                                  | 0.21 | *** |
| T2                    | A           | 589±487                | 3.47                                                  | 0.75 | T2                    | A           | 1080±99                | 3.35                                                  | 0.21 |     |
|                       | C           | 487±278                | 3.36                                                  | 0.46 |                       | C           | >2 μM                  | 4.21                                                  |      |     |
|                       | G           | 156±124                | 2.67                                                  | 0.7  |                       | G           | >2 μM                  | 4.21                                                  |      | *** |
| G3                    | C           | >2 μM                  | 4.21                                                  |      | G3                    | C           | 646±39                 | 3.03                                                  | 0.21 | *** |
|                       | A           | 437±398                | 3.29                                                  | 0.96 |                       | A           | 285±32                 | 2.55                                                  | 0.21 |     |
|                       | T           | 458±318                | 3.32                                                  | 0.57 |                       | T           | 307±42                 | 2.59                                                  | 0.22 |     |
| T4                    | A           | 599±255                | 3.48                                                  | 0.37 | T4                    | A           | 460±38                 | 2.83                                                  | 0.21 |     |
|                       | G           | 98±58                  | 2.40                                                  | 0.47 |                       | G           | 94±19                  | 1.88                                                  | 0.24 |     |
|                       | C           | 452±369                | 3.31                                                  | 0.73 |                       | C           | 74±29                  | 1.74                                                  | 0.32 | **  |
| A5                    | T           | 110±53                 | 2.47                                                  | 0.40 | A5                    | T           | 723±26                 | 3.10                                                  | 0.21 |     |
|                       | G           | Not done               |                                                       |      |                       | G           | >2 μM                  | 4.21                                                  |      |     |
|                       | C           | 13.1±4.2               | 1.19                                                  | 0.31 |                       | C           | 717±177                | 3.10                                                  | 0.25 | *** |
| A6                    | T           | 483±216                | 3.35                                                  | 0.38 | A6                    | T           | 596±59                 | 2.99                                                  | 0.21 |     |
|                       | G           | 540±190                | 3.42                                                  | 0.33 |                       | G           | 333±26                 | 2.64                                                  | 0.21 | **  |
|                       | C           | 92±64                  | 2.36                                                  | 0.57 |                       | C           | 533±50                 | 2.92                                                  | 0.21 |     |
| A7                    | G           | 36.9±17.8              | 1.81                                                  | 0.40 | C7                    | G           | 701±74                 | 3.09                                                  | 0.21 | *** |
|                       | C           | 32.5±15                | 1.73                                                  | 0.39 |                       | A           | 642±45                 | 3.03                                                  | 0.21 | *** |
|                       | T           | 13.3±4.2               | 1.20                                                  | 0.32 |                       | T           | 918±71                 | 3.25                                                  | 0.21 | *** |
| C8                    | G           | >2 μM                  | 4.21                                                  |      | C8                    | G           | >2 μM                  | 4.21                                                  |      |     |
|                       | A           | 450±124                | 3.31                                                  | 0.30 |                       | A           | 239±46                 | 2.44                                                  | 0.24 | **  |
|                       | T           | Not done               |                                                       |      |                       | T           | 63±11                  | 1.64                                                  | 0.23 |     |

The standard errors of the  $\Delta\Delta G$ s are the propagated errors from the wild-type and mutant sequences.  $\Delta\Delta G^\circ$ s and corresponding propagated errors were calculated using wild-type O<sub>I</sub> K<sub>d</sub> is 4.07±1.33 nM and wild-type O<sub>E</sub> K<sub>d</sub> of 1.8±0.7 nM. p of \*\* and \*\*\* indicate rejection of the null hypothesis at the level of 0.05 and 0.01 level of confidence, respectively. The standard errors used to calculate the p value are the average of the two standard errors of the corresponding positions. The K<sub>d</sub>s that were estimated to be greater than 2 μM were derived from nearly linear binding isotherms in the measured concentration range; thus, the value reflects a lower limit. For the determination of the p value in these cases, the standard errors were assumed to be that of the other observation in the pair. The font color is color matched with the plot presented in Figures 1 and 2 of the manuscript. SE stands for the standard error of the mean.

**Table S3**

The Effect of Base Mutations in the Right half

| Seq O <sub>E</sub> | Seq sub. | K <sub>d</sub> (nM) | ΔΔG° Kcal. Mole <sup>-1</sup> | SE   | Seq O <sub>I</sub> | Seq sub. | K <sub>d</sub> (nM) | ΔΔG° Kcal. Mole <sup>-1</sup> | SE   | P   |
|--------------------|----------|---------------------|-------------------------------|------|--------------------|----------|---------------------|-------------------------------|------|-----|
| G1'                | C        | 194+76              | 2.80                          | 0.35 | G1'                | C        | 101+34              | 1.92                          | 0.29 |     |
|                    | A        | 62+22               | 2.12                          | 0.33 |                    | A        | 210+84              | 2.36                          | 0.33 |     |
|                    | T        | 202+58              | 2.83                          | 0.31 |                    | T        | 128+49              | 2.07                          | 0.32 | *   |
| T2'                | A        | 206+62              | 2.84                          | 0.31 | T2'                | A        | 56+15               | 1.57                          | 0.26 | *** |
|                    | G        | >2 μM               | 4.21                          |      |                    | G        | 127+44              | 2.06                          | 0.30 | *** |
|                    | C        | 278+135             | 3.02                          | 0.39 |                    | C        | 26+22               | 1.11                          | 0.78 | **  |
| G3'                | C        | 564+225             | 3.45                          | 0.36 | G3'                | C        | 29+13               | 1.18                          | 0.35 | *** |
|                    | A        | 489+465             | 3.36                          | 1.14 |                    | A        | 33+7                | 1.25                          | 0.24 | **  |
|                    | T        | 464+278             | 3.33                          | 0.48 |                    | T        | 1010+59             | 3.31                          | 0.21 |     |
| G4'                | C        | 155+64              | 2.67                          | 0.36 | G4'                | C        | 452+49              | 2.82                          | 0.21 |     |
|                    | A        | 106+33              | 2.44                          | 0.32 |                    | A        | >2 μM               | 4.21                          |      | *** |
|                    | T        | 64+30               | 2.14                          | 0.39 |                    | T        | 649+103             | 3.04                          | 0.23 | **  |
| A5'                | T        | 48+23               | 1.97                          | 0.40 | T5'                | A        | 230+80              | 2.42                          | 0.31 |     |
|                    | G        | 316+104             | 3.10                          | 0.32 |                    | G        | 1220+223            | 3.42                          | 0.23 |     |
|                    | C        | >2 μM               | 4.21                          |      |                    | C        | 393+112             | 2.74                          | 0.27 | *** |
| A6'                | T        | >2 μM               | 4.21                          |      | A6'                | T        | 783+93              | 3.15                          | 0.22 | *** |
|                    | G        | >2 μM               | 4.21                          |      |                    | G        | 420+85              | 2.78                          | 0.24 | *** |
|                    | C        | >2 μM               | 4.21                          |      |                    | C        | 58+20               | 1.59                          | 0.30 | *** |
| T7'                | C        | 30+7.7              | 1.69                          | 0.29 | G7'                | C        | 58+24               | 1.59                          | 0.33 |     |
|                    | A        | 361+130             | 3.18                          | 0.34 |                    | A        | 81+30               | 1.79                          | 0.31 | *** |
|                    | G        | 4.4+3.9             | 0.53                          | 0.88 |                    | T        | >2 μM               | 4.21                          |      | *** |
| C8'                | G        | 525+252             | 3.40                          | 0.40 | C8'                | G        | 18+5                | 0.89                          | 0.27 | *** |
|                    | A        | 31+13               | 1.71                          | 0.37 |                    | A        | 676+152             | 3.06                          | 0.25 | *** |
|                    | T        | >2 μM               | 4.21                          |      |                    | T        | >2 μM               | 4.21                          |      |     |

The standard errors of the ΔΔGs are the propagated errors from the wild-type and mutant sequences. ΔΔG°s and corresponding propagated errors were calculated using wild-type O<sub>I</sub> K<sub>d</sub> is 4.07±1.33 nM and wild-type O<sub>E</sub> K<sub>d</sub> of 1.8±0.7 nM. p of \*\* and \*\*\* indicate rejection of the null hypothesis at the level of 0.05 and 0.01 level of confidence, respectively. The standard errors used to calculate the p value are the average of the two standard errors of the corresponding positions. The K<sub>d</sub>s that were estimated to be greater than 2 μM were derived from nearly linear binding isotherms; thus, the value reflects a lower limit. For the determination of the p value in these cases, the standard errors were assumed to be that of the other observation in the pair. The font color is color matched with the plot presented in Figures 1 and 2 of the manuscript. SE stands for the standard error of the mean.

Table S4: Comparison of Protein-DNA interfaces of O<sub>E</sub>/GalR and O<sub>I</sub>/GalR complexes

| Protein Residue(C hain) | O <sub>E</sub> DNA Residue (Chain) | O <sub>E</sub> DNA Atom | O <sub>E</sub> distance | O <sub>E</sub> Angle | Protein Residue(Chain) | O <sub>I</sub> Residue (Chain) | O <sub>I</sub> DNA Atom | O <sub>I</sub> distance | O <sub>I</sub> angle |
|-------------------------|------------------------------------|-------------------------|-------------------------|----------------------|------------------------|--------------------------------|-------------------------|-------------------------|----------------------|
| I5-N(A)                 | G10(D)                             | O2P                     | 2.82                    | 166.7                | I5-N(A)                | T10(D)                         | O2P                     | 2.78                    | 166.7                |
| S15-N                   | G2(C)                              | O2P                     | 2.95                    | 157.3                | S15-N(A)               | G2(C)                          | O1P                     | 3.1                     | 120.4                |
|                         |                                    |                         |                         |                      | S15-N(A)               | G2(C)                          | O2P                     | 3.1                     | 150.0                |
| S15-OG(A)               | G2(C)                              | O2P                     | 2.55                    | 165.9                | S15-OG(A)              | G2(C)                          | O2P                     | 2.51                    | 175.7                |
| S20-OG(A)               | T11(D)                             | O2P                     | 2.63                    | 162.4                | S20-OG(A)              | T11(D)                         | O2P                     | 2.99                    | 158.5                |
| R21-NH1(A)              | G2(C)                              | N7                      | 3.11                    | 163.7                | R21-NH1(A)             | G2(C)                          | O6                      | 2.70                    | 143.8                |
| R21-NH2(A)              | G2(C)                              | O6                      | 2.80                    | 170.4                | R21-NH2(A)             | G2(C)                          | N7                      | 2.90                    | 169.6                |
| N24-ND2(A)              | T11(D)                             | O1P                     | 2.75                    | 164.5                | N24-ND2(A)             | T11(D)                         | O1P                     | 3.28                    | 165.8                |
| Y46-OH(A)               | G10(D)                             | O1P                     | 2.80                    | 175.0                | Y46-OH(A)              | T10(D)                         | O1P                     | 3.07                    | 146.6                |
| N49-N(A)                | G10(D)                             | O1P                     | 2.89                    | 138.8                | N49-N(A)               | T10(D)                         | O1P                     | 2.89                    | 178.3                |
| R53-NH1(A)              | T11(D)                             | O1P                     | 2.84                    | 147.3                | R53-NH1(A)             | T11(D)                         | O1P                     | 2.80                    | 162.9                |
| Q58-NE2(A)              | T12(D)                             | O1P                     | 2.97                    | 168.9                |                        |                                |                         |                         |                      |
| A52-O(A)                | G9(D)                              | N2                      | 3.46                    | 142.2                | A52-O(A)               | G9(D)                          | N2                      | 3.20                    | 142.2                |
|                         |                                    |                         |                         |                      | K1-NZ(B)               | C7(C)                          | O1P                     | 2.83                    | 147.5                |
| I5-N(B)                 | C9(C)                              | O2P                     | 2.94                    | 172.1                | I5-N(B)                | A9(C)                          | O2P                     | 2.87                    | 174.5                |
| S15-N(B)                | G13(D)                             | O2P                     | 2.77                    | 168.2                | S15-N(B)               | G3(D)                          | O2P                     | 2.81                    | 173.6                |
| S15-OG(B)               | G13(D)                             | O2P                     | 2.80                    | 175.7                | S15-OG(B)              | G3(D)                          | O2P                     | 3.07                    | 140.3                |
|                         |                                    |                         |                         |                      | S15-OG(B)              | G3(D)                          | 5'                      | 3.23                    | 128.2                |
| S20-OG(B)               | T10(C)                             | O2P                     | 2.81                    | 171.0                | S20-OG(B)              | T10(C)                         | O2P                     | 2.65                    | 171.1                |
| S20-OG(B)               | T10(C)                             | O5'                     | 3.39                    | 123.5                |                        |                                |                         |                         |                      |
| R21-NH1(B)              | G13(D)                             | N7                      | 2.99                    | 126.3                | R21-NH1(B)             | G3(D)                          | N7                      | 3.02                    | 142.2                |
| R21-NH1(B)              | G13(D)                             | O6                      | 2.96                    | 143.0                | R21-NH1(B)             | G3(D)                          | O6                      | 2.94                    | 176.9                |
| R21-NH2(B)              | C13(C)                             | N4                      | 3.44                    | 132.0                | R21-NH2(B)             | C12(C)                         | N4                      | 3.34                    | 128.5                |
| R21-NH2(B)              | G13(D)                             | O6                      | 2.86                    | 147.4                |                        |                                |                         |                         |                      |
| N24-ND2(B)              | T10(C)                             | O1P                     | 2.97                    | 166.3                | N24-ND2(B)             | T10(C)                         | O1P                     | 2.74                    | 165.4                |
| K28-NZ(B)               | G1(D)                              | N7                      | 2.88                    | 170.6                |                        |                                |                         |                         |                      |
| S30-N(B)                | T2(D)                              | O2P                     | 2.92                    | 161.2                | S30-N(B)               | T2(D)                          | O2P                     | 2.84                    | 170.1                |
| S30-OG(B)               | T2(D)                              | O1P                     | 2.68                    | 170.0                | S30-OG(B)              | T2(D)                          | O1P                     | 2.66                    | 164.1                |
|                         |                                    |                         |                         |                      | S30-OG(B)              | T2(D)                          | O2P                     | 3.44                    | 130.5                |
| S33-OG(B)               | T2(D)                              | O2P                     | 2.83                    | 170.0                | S33-OG(B)              | T2(D)                          | O1P                     | 2.87                    | 147.3                |
|                         |                                    |                         |                         |                      | S33-OG(B)              | T2(D)                          | O2P                     | 3.40                    | 142.5                |
| Y46-OH(B)               | C9(C)                              | O1P                     | 2.67                    | 160.2                | Y46-OH(B)              | A9(C)                          | O1P                     | 2.88                    | 166.9                |
| N49-N(B)                | C9(C)                              | O1P                     | 3.41                    | 164.9                | N49-N(B)               | A9(C)                          | O1P                     | 3.02                    | 166.6                |
| A52-O(B)                | G8(C)                              | N2                      | 2.82                    | 170.7                | A52-O(B)               | G8(C)                          | N2                      | 3.29                    | 149.0                |
|                         |                                    |                         |                         |                      | R53-NE(B)              | A9(C)                          | O3'                     | 3.22                    | 143.5                |
|                         |                                    |                         |                         |                      | R53-NE(B)              | T10(C)                         | O1P                     | 2.99                    | 149.9                |
|                         |                                    |                         |                         |                      | R53-NH2(B)             | T10(C)                         | O1P                     | 2.90                    | 157.6                |

**Table S5**

Regulatory region sequence of the reporter gene constructs used in this study

| The plasmid composition           | Regulatory region gene contains                               | Sequence of the regulatory region                                                                                                                                 |
|-----------------------------------|---------------------------------------------------------------|-------------------------------------------------------------------------------------------------------------------------------------------------------------------|
| <b>O<sub>E</sub>O<sub>I</sub></b> | Operators O <sub>E</sub> & O <sub>I</sub> , promoters P1 & P2 | 5' GGATCC GTGTAACGATTCCACTAA TTTATTCCATGTCACA CTTTTCGCAT<br>CTTGTTATGCTATGGTTATTTTCATACCATAAGCCTAATGGAGCGA<br>ATTATGA GAGTTCTGGTTACCG GTGGTAGCGGTACAT TCTAGA -3'  |
| <b>O<sub>E</sub>O<sub>E</sub></b> | Operators O <sub>E</sub> & O <sub>E</sub> , promoters P1 & P2 | 5' GGATCC GTGTAACGATTCCACTAA TTTATTCCATGTCACA CTTTTCGCAT<br>CTTGTTATGCTATGGTTATTTTCATACCATAAGCCTAATGGAGCGA<br>ATTATGA GAGTTCTGGTTACCG GTGTAACGATTCCACT TCTAGA -3' |
| <b>O<sub>I</sub>O<sub>I</sub></b> | Operators O <sub>I</sub> & O <sub>I</sub> , promoters P1 & P2 | 5' GGATCC GTGGTAGCGGTACAT TAA TTTATTCCATGTCACA CTTTTCGCAT<br>CTTGTTATGCTATGGTTATTTTCATACCATAAGCCTAATGGAGCGA<br>ATTATGA GAGTTCTGGTTACCG GTGGTAGCGGTACAT TCTAGA -3' |

The operator O<sub>E</sub> is highlighted yellow, O<sub>I</sub> is highlighted Magenta and the promoters are highlighted green.

# Figures

Figure S1: Sequences of Gal operators  $O_E$  and  $O_I$ . Red marked bases show the differences between the two operators. The sequences in bold represent actual operator sequences which are flanked by two GC base pairs. The numbering is shown at the top.

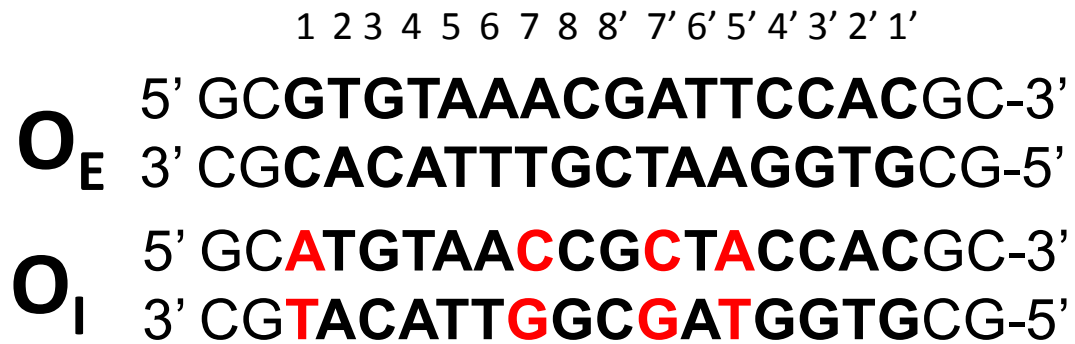



Figure S2: The red marked bases are at positions 7/7', the most variable position in the sequences. The logo was designed by webserver <http://weblogo.berkeley.edu/logo.cgi>

**(A) Determination of consensus sequence based on four half sites of Gal operators.**

|                  |                |                |                               |                  |                |                    |   |                             |
|------------------|----------------|----------------|-------------------------------|------------------|----------------|--------------------|---|-----------------------------|
| G                | T              | G              | T                             | A                | A              | A                  | C | O <sub>E</sub> --sequence 1 |
| G                | T              | G              | G                             | A                | A              | T                  | C | O <sub>E</sub> --sequence 2 |
| G                | T              | G              | G                             | T                | A              | G                  | C | O <sub>I</sub> --sequence 3 |
| A                | T              | G              | T                             | A                | A              | C                  | C | O <sub>I</sub> --sequence 4 |
| G <sub>3</sub> A | T <sub>4</sub> | G <sub>4</sub> | G <sub>2</sub> T <sub>2</sub> | A <sub>3</sub> T | A <sub>4</sub> | ATGCC <sub>4</sub> |   | <b>Distribution</b>         |
| G                | T              | G              | G/T                           | A                | A              | N                  | C | <b>Consensus</b>            |

**(B) Sequence Logo**

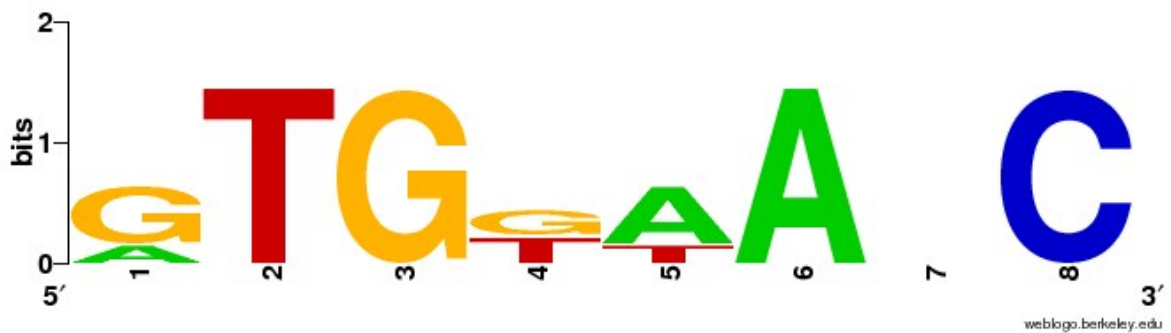

Figure S3: (A) Structure and interaction of 5'-basepair O<sub>E</sub> (5' refers to position No.). (B) Structure and interaction of 5'-basepair O<sub>I</sub> (5' refers to position No.)

A

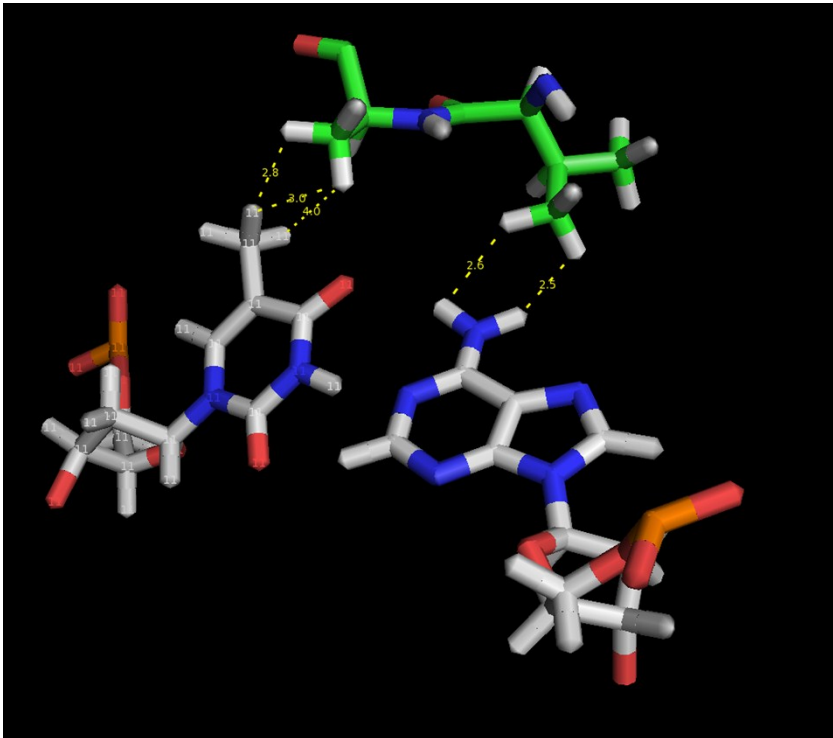

B

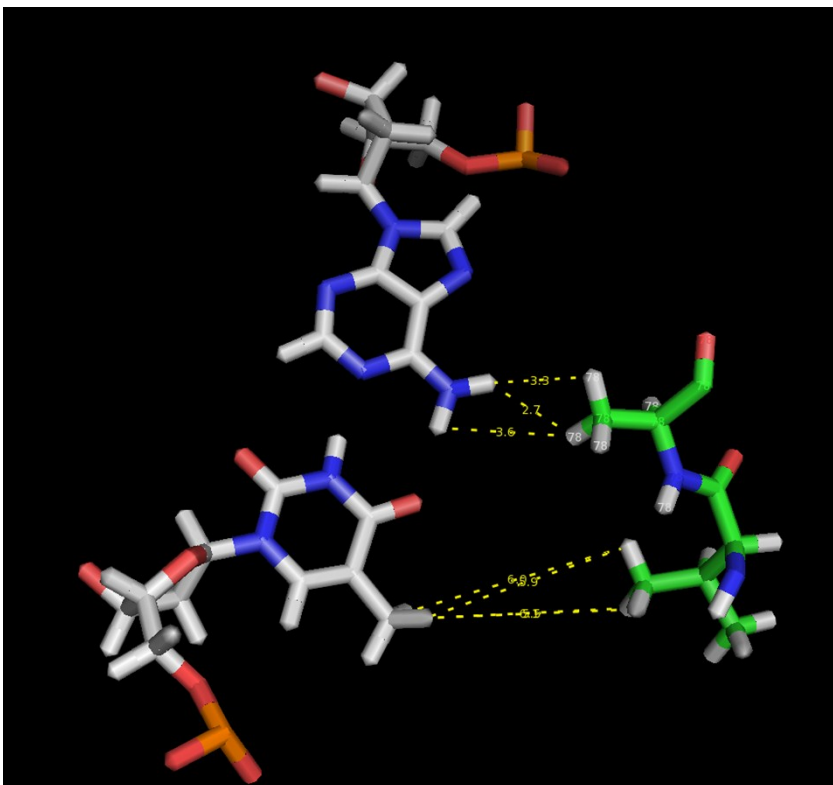

Figure S4: (A) Structure and interaction of 7'-basepair O<sub>E</sub>. (B) Structure and interaction of 7'-basepair O<sub>I</sub>.

A

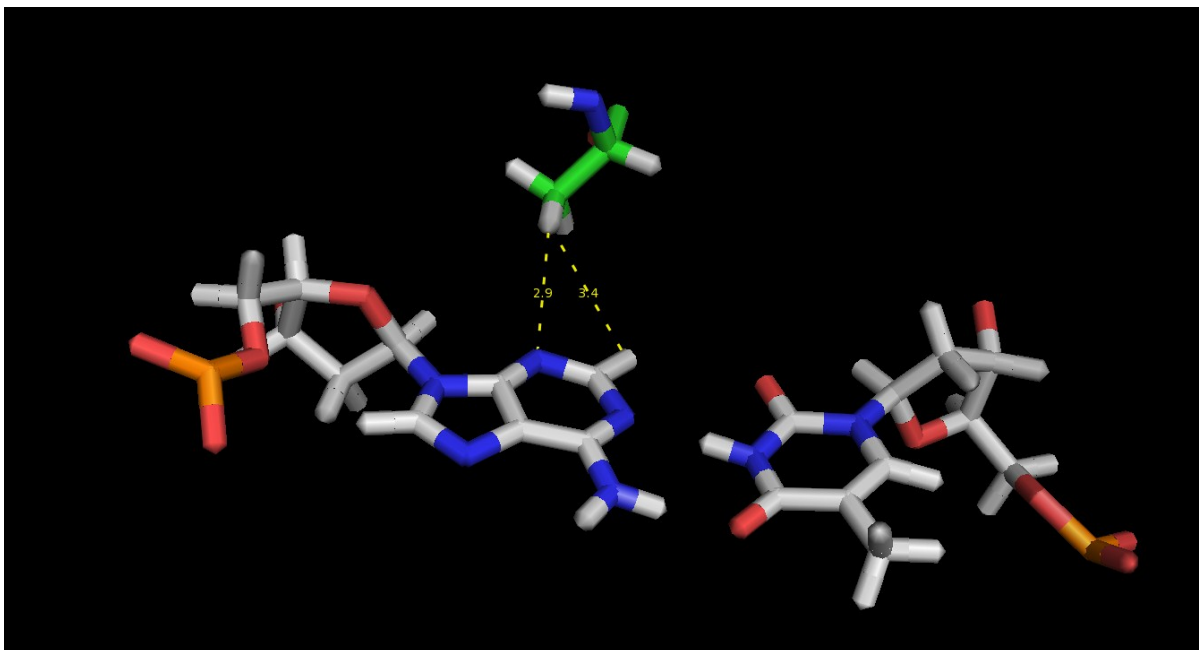

B

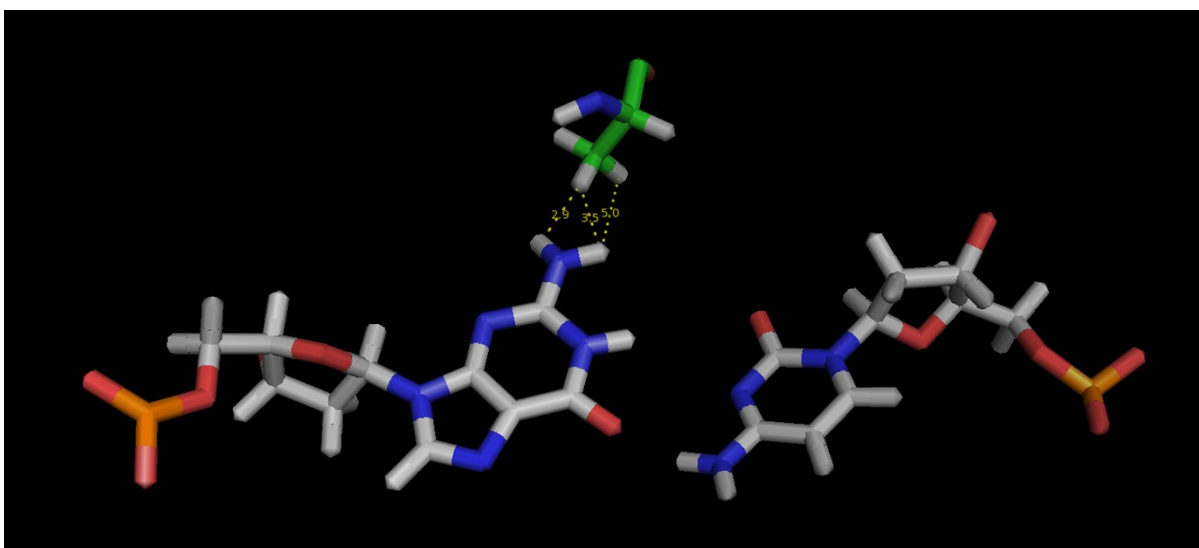

Supplement: c6cp03278h1.pdf [file c6cp03278h1.pdf]
